# Supplementary material
Source: Springer Nature journal article supplement (https://www.springermedizin.de/resource/supplementary/12885_2010_2573_MOESM4_ESM.pdf/9462598)
Supplement: MOESM4 [file 9462598]

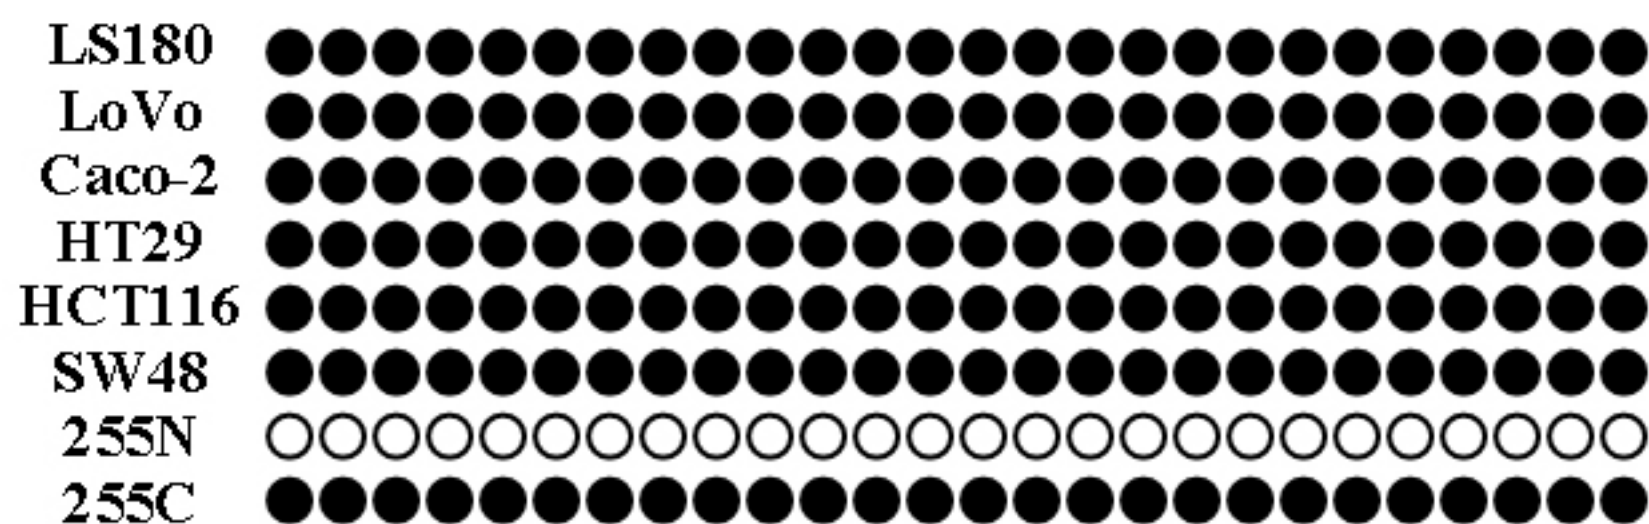

CpG island

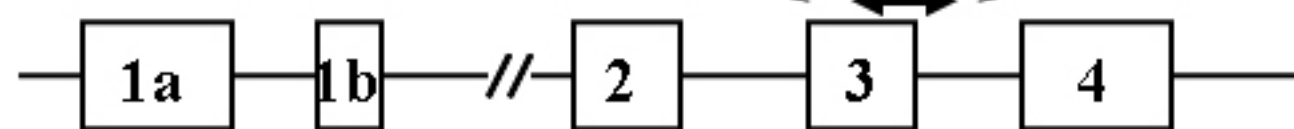

CpG-rich sequence

Seg.1

Seg.2

Seg.3

Seg.4

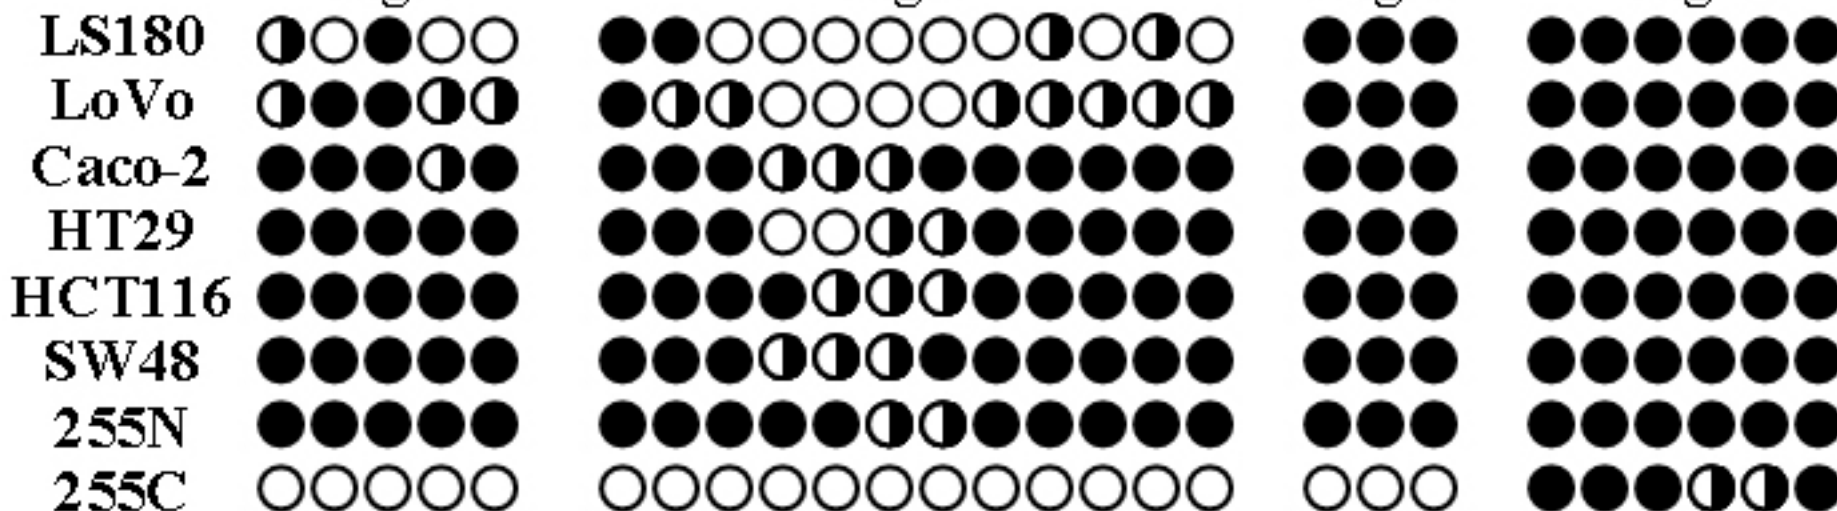

○ Unmethylated

◐ Partially methylated

● Fully methylated
